# Supplementary material
Source: publisher figshare collection journal article supplement (https://frontiersin.figshare.com/ndownloader/files/30834478)
Supplement: Supplementary file 1 [file 30834478]

## **Information and consent to the investigation**

### ***Personalized Learning Opportunities in 3D VR***

The aim of the study is to observe the categorization of learning preferences and styles. During the task, participants see pictures, hear and read words, and then describe what they remember. After the examination, a questionnaire (Kolb's learning styles questionnaire) is also completed. The test above has no adverse consequences. The test takes approximately 30 minutes. The study can be stopped at any time without consequences, in which case the data already recorded will not be evaluated.

After the study, participants learn in a personalized educational environment and curricula. Researchers measure their learning outcomes.

I declare that I have received satisfactory information about the goals and nature of the study. I declare that I am participating in this study voluntarily.

Neither I nor my relatives requested or received financial compensation for my contribution to the investigations.

I acknowledge that the personally identifiable information will be treated confidentially by the study manager and will not be disclosed to anyone other than those involved in the conduct of the experiment. I agree that non-identifiable data included in the study should be made available to other researchers.

I declare that I have no known neurological or psychiatric disorders. I declare that my vision and hearing is intact or corrected to normal. I have no dyslexia, dysgraphia or other learning difficulties.

I acknowledge that the test data are for research and non-diagnostic purposes only, I do not request such an opinion after the tests have been performed.

I, the undersigned \_\_\_\_\_, agree that I will participate in the examinations of Széchenyi István University on \_\_\_\_ September 2019.
